# Supplementary material for: Doxycycline Ameliorates the Severity of Experimental Proliferative Vitreoretinopathy in Mice
Source: Int J Mol Sci. 2021 Oct 28;22(21):11670. doi: 10.3390/ijms222111670 (PMC8584209; doi:10.3390/ijms222111670)
Supplement: Supplementary file 1 [file ijms-22-11670-s001.zip]

Archive with 11 entries (11 files):
- Doxycycline ameliorates PVR supplementary figures.pdf
- SF 1A.tif
- SF 1B.jpg
- SF 1C.jpg
- SF 1D.jpg
- SF 1E.jpg
- SF 1F.jpg
- SF 1G.jpg
- SF 2.jpg
- SF 3 left.tif
- SF 3 Right.jpg
